# Supplementary material for: Phosphorus-doped silicon nanorod anodes for high power lithium-ion batteries
Source: publisher site journal article supplement (doi:10.3762/bjnano.8.24), 2017-01-23
Supplement: Additional file 1 [file 2190-4286-8-24-S1.pdf]

**Supporting Information**  
**for**  
**Phosphorus-doped silicon nanorods anode for**  
**high power lithium-ion battery**

Chao Yan<sup>‡,1</sup>, Qianru Liu<sup>‡,1</sup>, Jianzhi Gao<sup>1</sup>, Zhibo Yang<sup>\*1</sup> and Deyan He<sup>2</sup>

Address: <sup>1</sup>School of Physics and Information Technology, Shaanxi Normal University, Xi' an 710119, China and <sup>2</sup>School of Physical Science and Technology, Lanzhou University, Lanzhou 730000, China

Email: Zhibo Yang - yangzhib15@snnu.edu.cn

\* Corresponding author

‡ These authors contribute equally

**Additional figures**

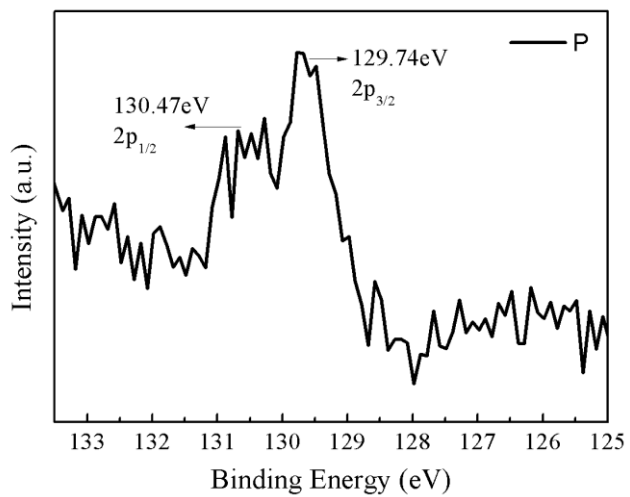

**Figure S1:** X-ray photoelectron spectroscopy (XPS) of the as prepared Si layer.

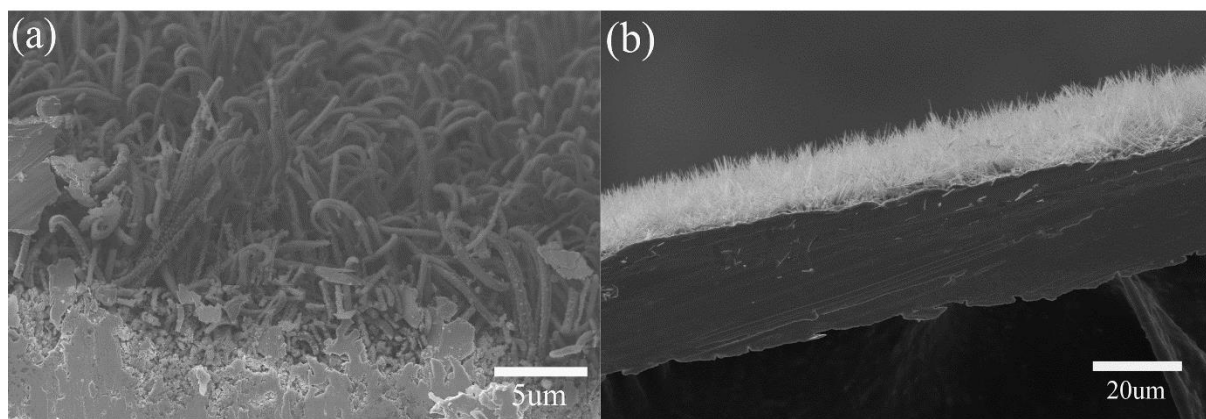

**Figure S2:** Cross section SEM images for (a) the Si anode and (b) the CuO nanorods.
